# Supplementary material
Source: PubMed Central journal article supplement (PMC165863)

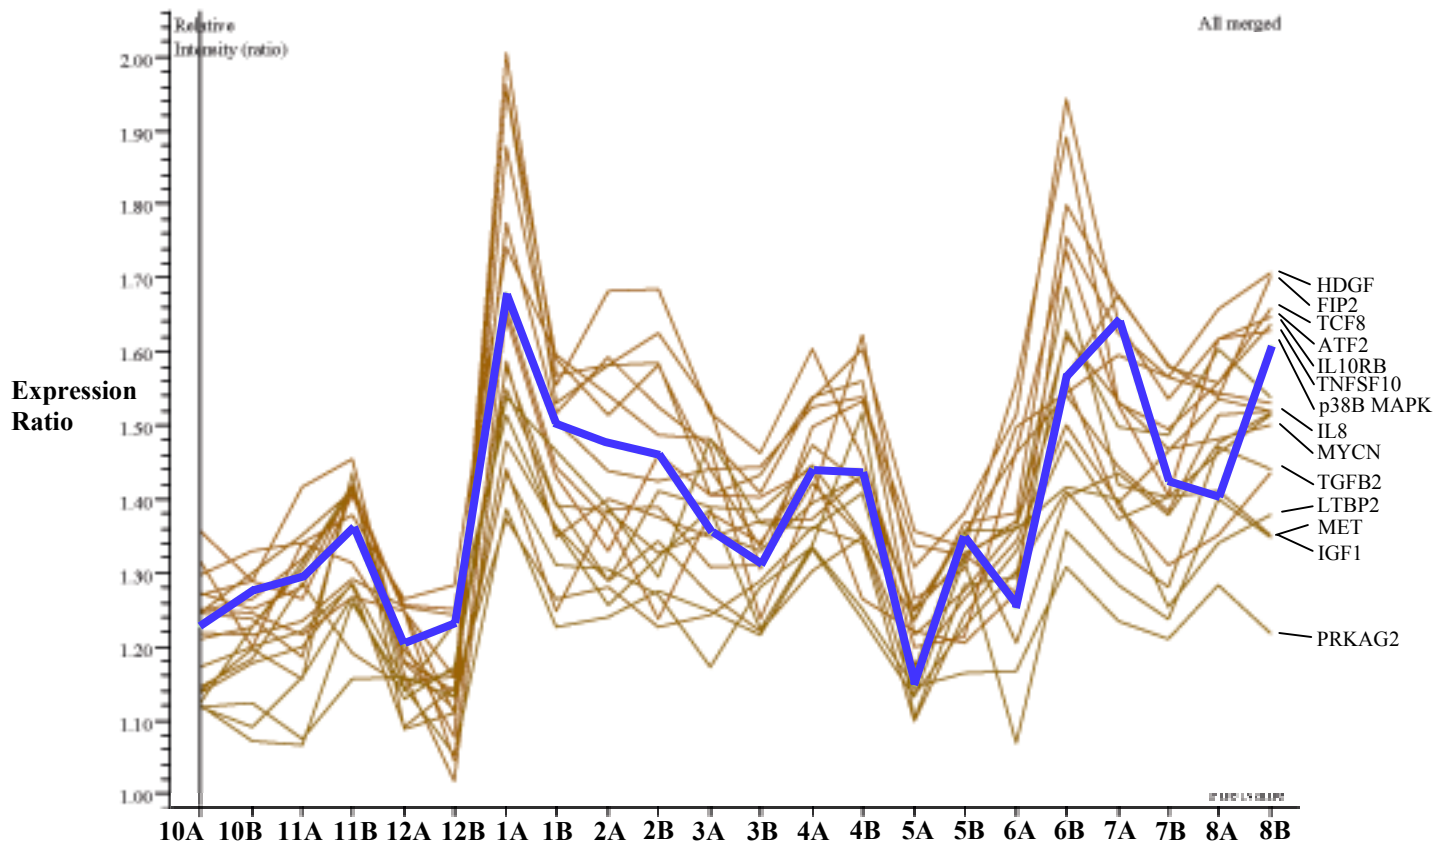

Supplement: pnas_1137463100_11.pdf [file pnas_1137463100_11.pdf]

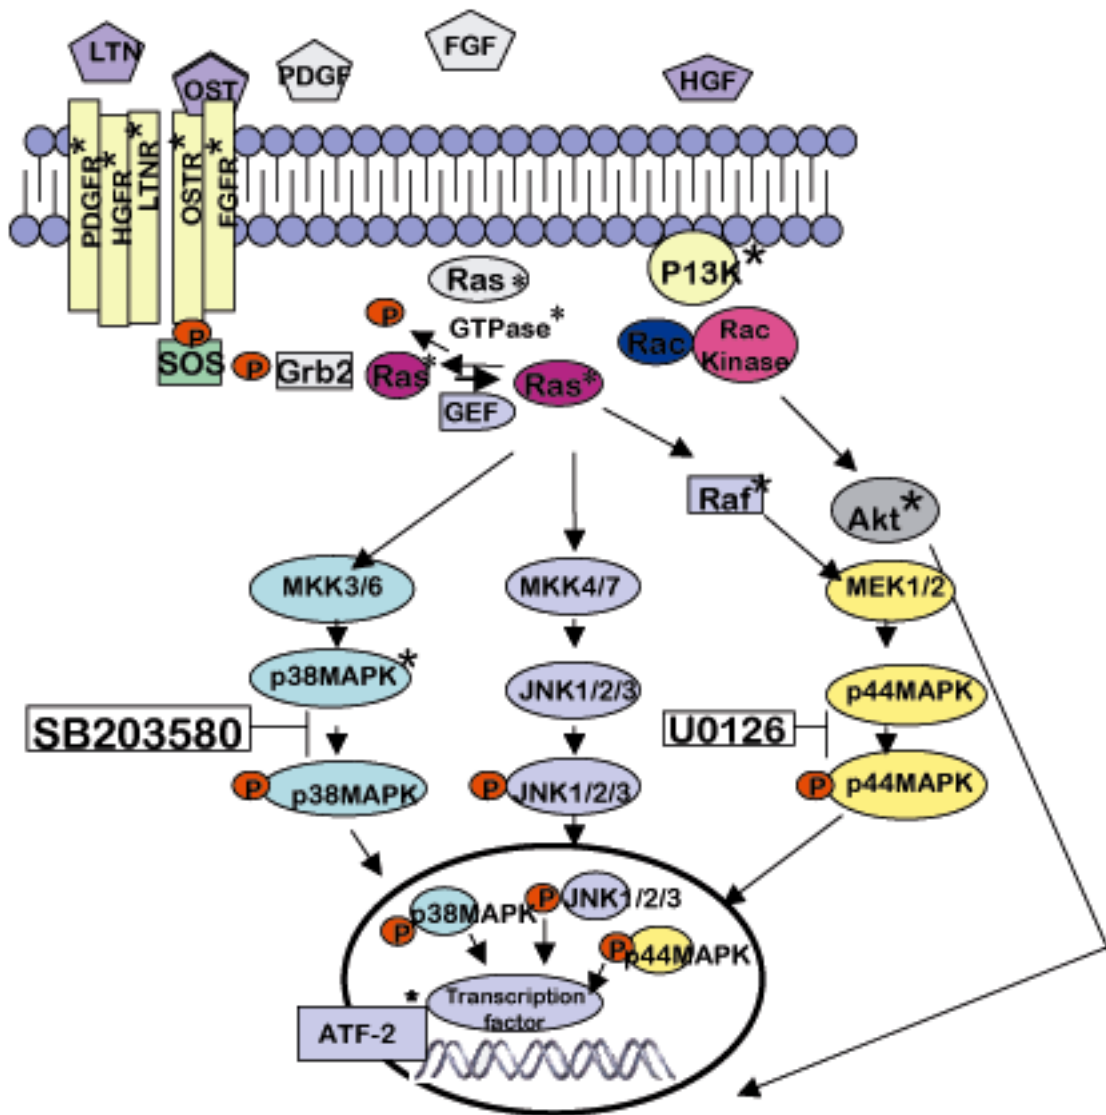

Supplement: pnas_1137463100_13.pdf [file pnas_1137463100_13.pdf]

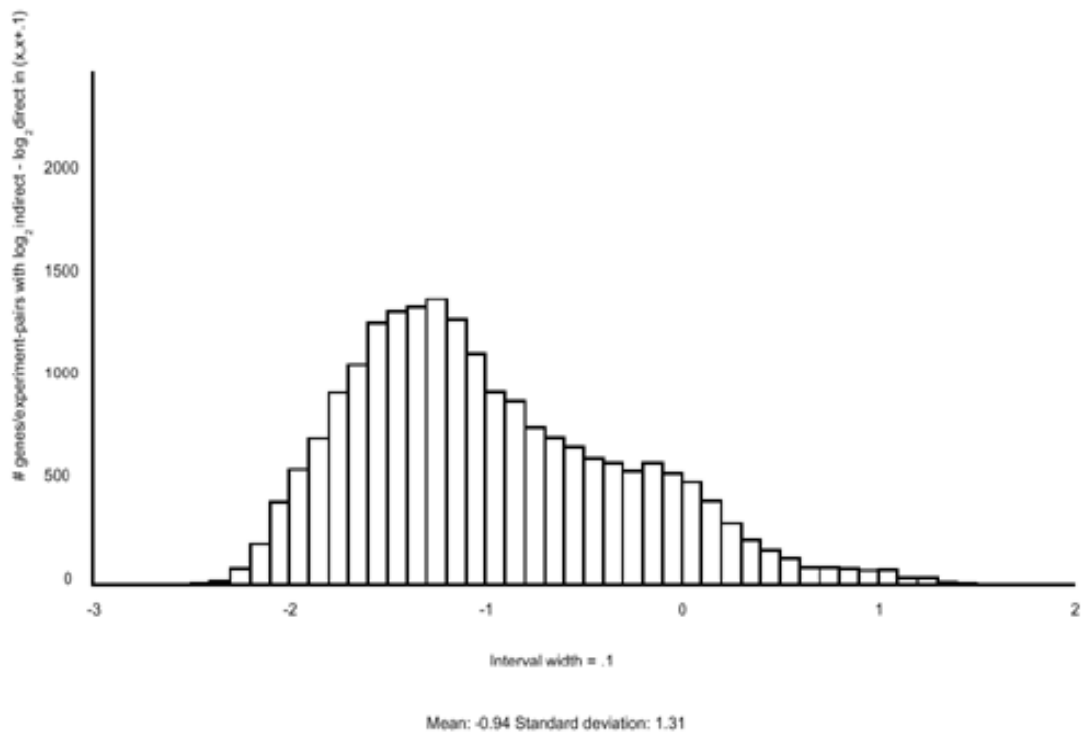

Supplement: pnas_1137463100_3.pdf [file pnas_1137463100_3.pdf]

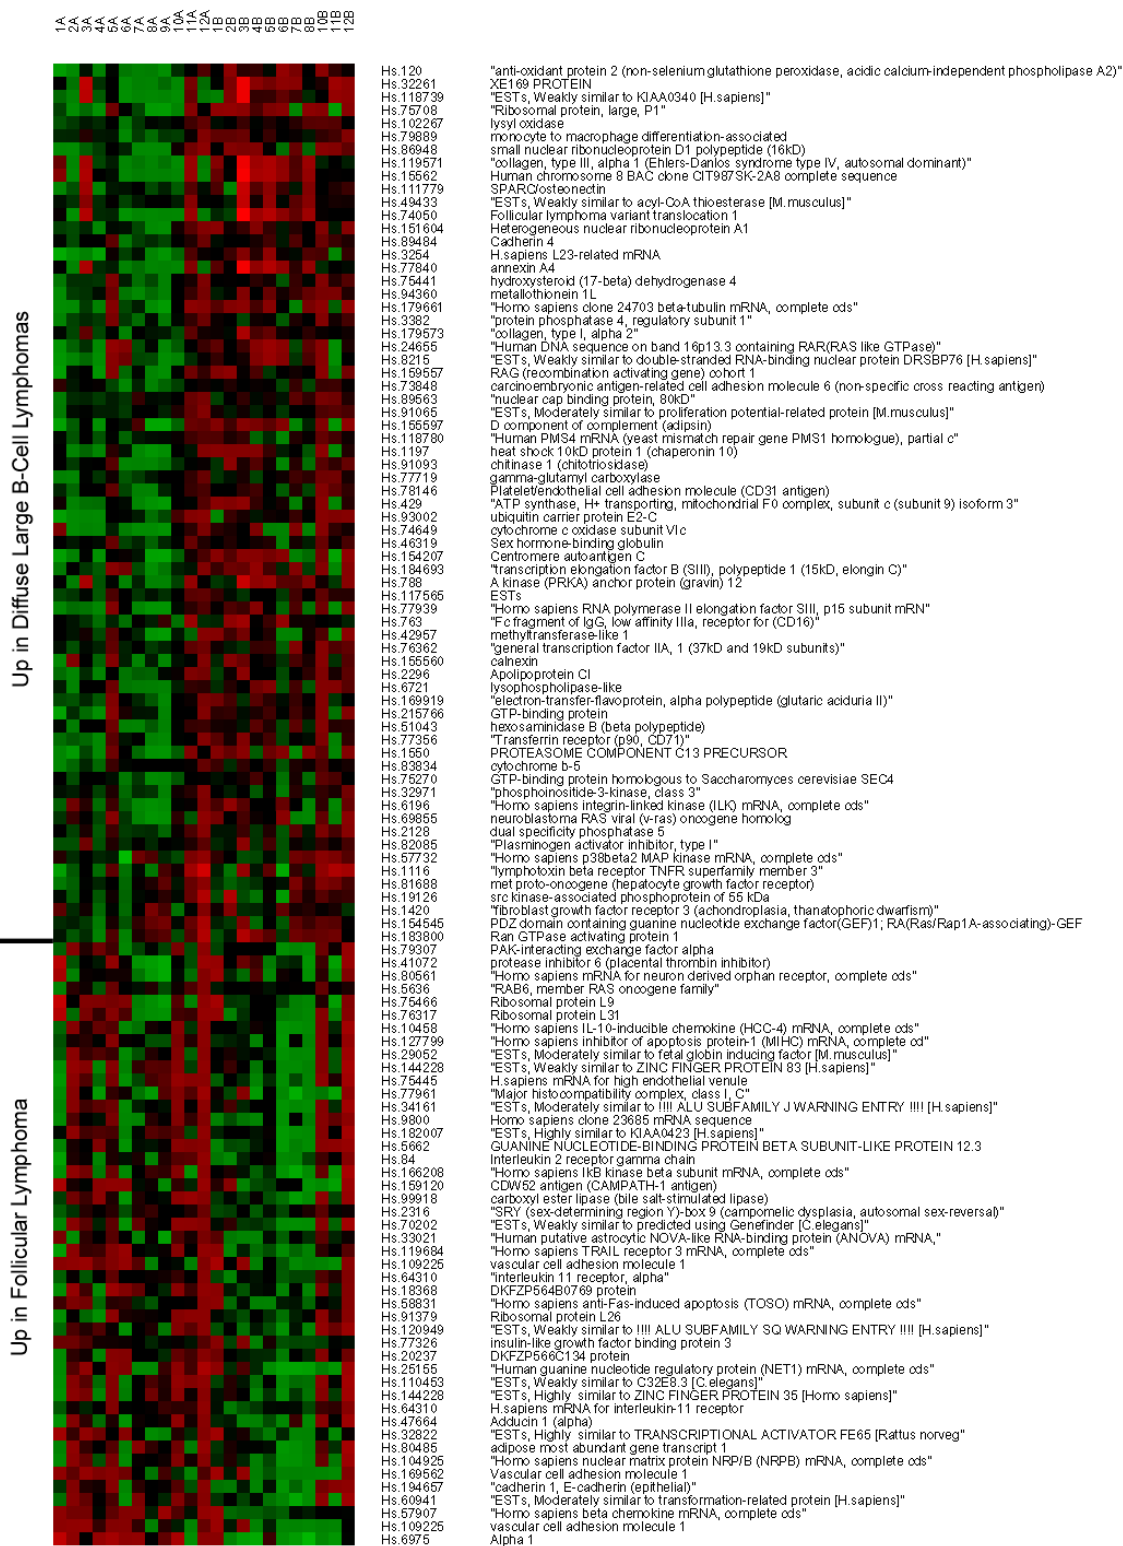

Supplement: pnas_1137463100_9.pdf [file pnas_1137463100_9.pdf]
